# Supplementary material for: A highly sensitive piezoresistive sensor with interlocked graphene microarrays for meticulous monitoring of human motions
Source: Royal Society of Chemistry journal article supplement (doi:10.1039/d0tc02539a), 2020-01-01
Supplement: d0tc02539a3.pdf [file d0tc02539a3.pdf]

## ESI Support Information

### Highly sensitive piezoresistive sensor with interlocked graphene microarrays for meticulous monitoring of human motions

Received 00th January 20xx,  
Accepted 00th January 20xx

DOI: 10.1039/x0xx00000x

**Lin Cheng,** <sup>||</sup><sup>a</sup> **Wei Qian,** <sup>||</sup><sup>a</sup> **Lei Wei,** <sup>a</sup> **Hengjie Zhang,** <sup>b</sup> **Tingyu Zhao,** <sup>a</sup> **Ming Li,** <sup>c</sup> **Aiping Liu,** <sup>\*a,d,e</sup> and **Huaping Wu** <sup>\*b</sup>

<sup>a</sup> *Center for Optoelectronics Materials and Devices, Key Laboratory of Optical Field Manipulation of Zhejiang Province, Zhejiang Sci-Tech University, Hangzhou 310018, P. R. China.*

<sup>b</sup> *Key Laboratory of Special Purpose Equipment and Advanced Processing Technology, Ministry of Education and Zhejiang Province, College of Mechanical Engineering, Zhejiang University of Technology, Hangzhou 310023, China.*

<sup>c</sup> *State Key Laboratory of Structural Analysis for Industrial Equipment, Dalian University of Technology, Dalian 116024, China.*

<sup>d</sup> *State Key Laboratory for Strength and Vibration of Mechanical Structures, School of Aerospace Engineering, Xi'an Jiaotong University, Xi'an 710049, P. R. China.*

<sup>e</sup> *State Key Laboratory of Digital Manufacturing Equipment and Technology, Huazhong University of Science and Technology, Wuhan 430074, P. R. China.*

\*Corresponding author. Tel.: +86 571 86843574; fax: +86 571 86843574.

E-mail address: liuaiping1979@gmail.com, wuhuaping@gmail.com

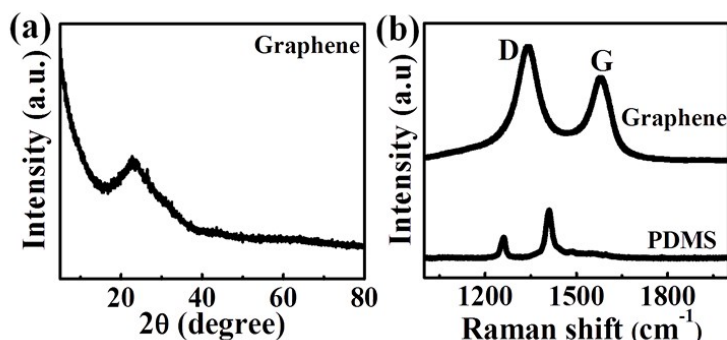

**Figure S1.** (a) X-ray diffraction (XRD) pattern of drop-coated graphene film. (b) Raman spectra of microstructured PDMS before and after drop-coating of graphene.

The diffraction peak at  $23.9^\circ$  can be assigned to the (002) reflection of graphene (Figure S1a). The characteristic peaks at  $1344\text{ cm}^{-1}$  and  $1580\text{ cm}^{-1}$  in the Raman spectra (Figure S1b) can be ascribed to D band (represents edges, disordered carbon and defects) and G band (corresponds to vibration of ordered  $\text{sp}^2$ -hybridized carbon), suggesting the successful modification of graphene on PDMS.

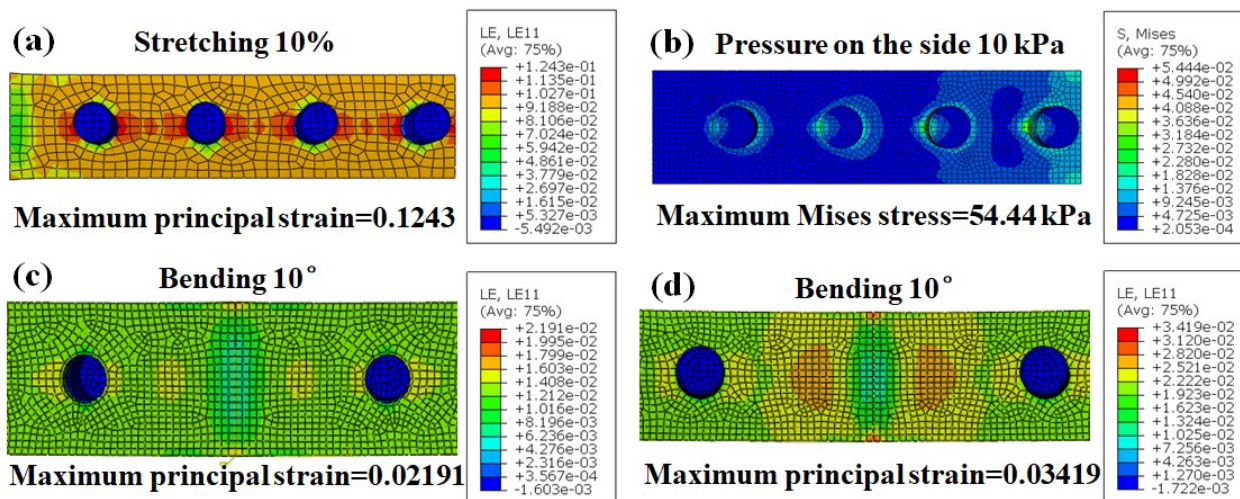

**Figure S2.** (a) Maximum principal strain, (b) maximum Mises stress, and (c) maximum principal strain of side-contact interlocked sensor under stretching, shear and bending forces. (d) Maximum principal strain of non-interlocked sensor under bending force.

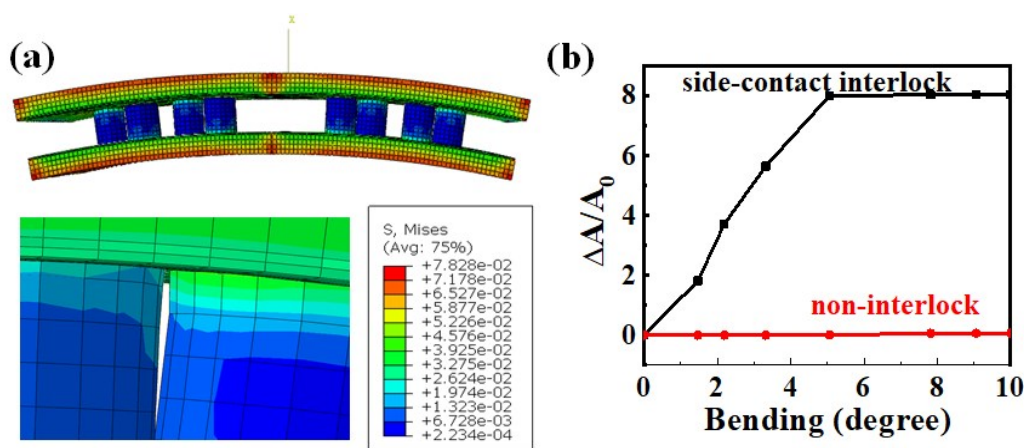

**Figure S3.** (a) Mises stress distribution of the side-contact interlocked sensor under bending force. (b) The change of area increment with bending angle for the side-contact interlocked and non-interlocked sensors.

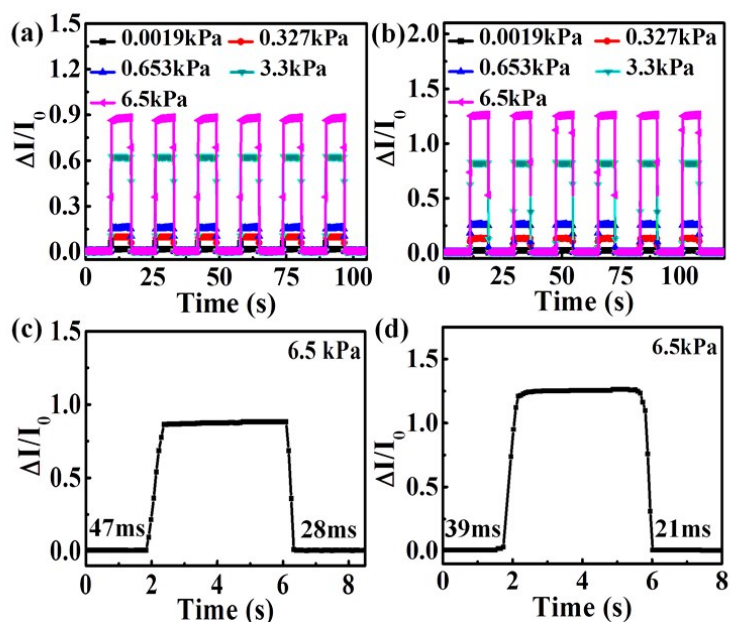

**Figure S4.** (a)-(b) Relative current changes of (a) planar sensor without microstructures and (b) single microarray sensor under different pressure loadings. (c)-(d) The response time and relaxation time of (c) planar sensor without microstructures and (d) single microarray sensor under a loading of 6.5 kPa.

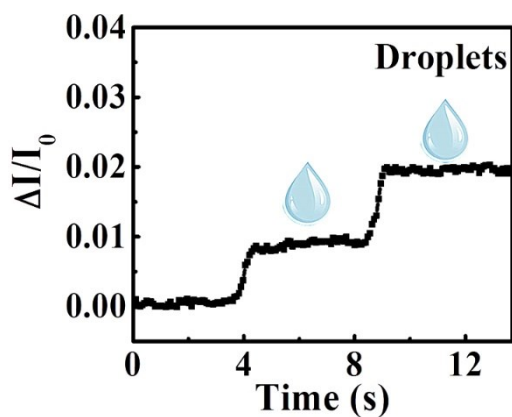

**Figure S5.** The electrical signal change of side-contact interlocked pressure sensor when a droplet (about 1.0 Pa) was continuously deposited on it.

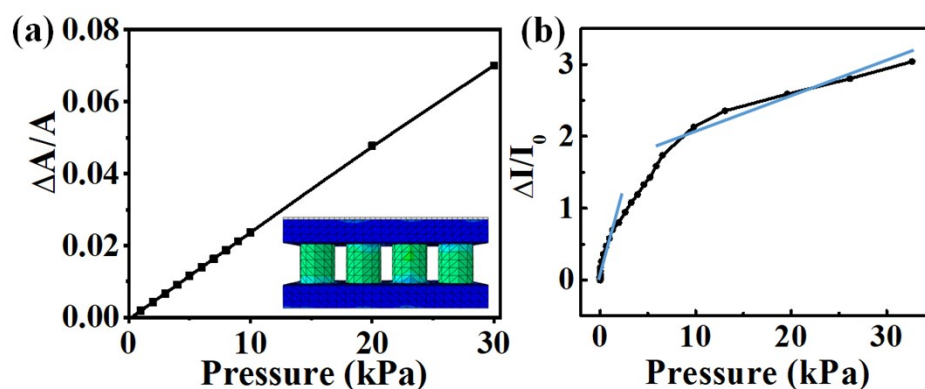

**Figure S6.** (a) The change of area increment with external pressure and stress distribution and (b) pressure sensitivity for the sensor with non-interlock interposition way.

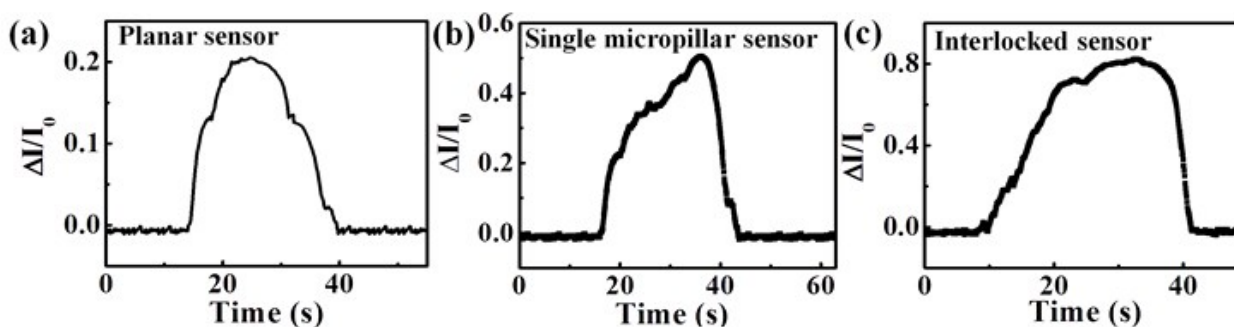

**Figure S7.** (a,d) Detection of backward bending gesture (low speed) by using different sensors: (a) planar sensor without microstructures, (b) single microarray sensor, and (c) side-contact interlocked sensors.

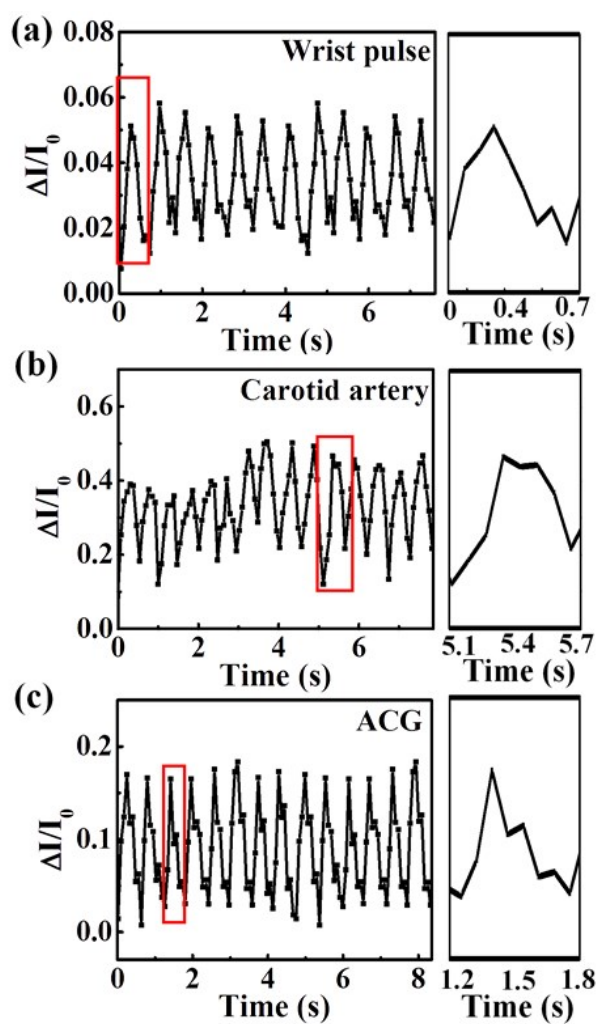

**Figure S8.** (a) Physiological signal patterns obtained by using side-contact interlocked sensors after exercise condition: (a) wrist pulse, (b) carotid artery, (c) ACG.

**Table S1.** A brief summary of performances of flexible pressure sensors.

| Sensors                                            | Workable range | Sensitivity<br>(kPa <sup>-1</sup> ) | Response time<br>(ms) | Reference |
|----------------------------------------------------|----------------|-------------------------------------|-----------------------|-----------|
| rGO/PU sponge                                      | 9 Pa-10 kPa    | 0.26 (<2 kPa)                       | -                     | (45)      |
| rGO foam                                           | 165 Pa-2 kPa   | 15.2 (<0.3 kPa)                     | -                     | (48)      |
| Carbonaceous nanofibrous<br>aerogels               | 10 Pa-4.5 kPa  | 0.43 (<3 kPa)                       | -                     | (49)      |
| Laser-scribed graphene pressure<br>sensors         | -110 kPa       | 0.96 (<50 kPa)                      | 72                    | (50)      |
| Double-layered graphene sensors                    | 0.3 Pa-10 kPa  | 0.24 (<600 Pa)                      | 390                   | (51)      |
| Conductive fibers coated with<br>dielectric rubber | -10 kPa        | 0.21 (<2 kPa)                       | 40                    | (52)      |
| Graphene/PI foam                                   | -6.5 kPa       | 0.18 (<2 kPa)                       | -                     | (53)      |
| Au-Ppy pressure sensors                            | 2 Pa-3 kPa     | 1.8 (<350 Pa)                       | -                     | (54)      |
| Graphene-CNTs hierarchical<br>foam                 | 36 Pa-13 kPa   | 0.19 (<2.5 kPa)                     | -                     | (55)      |
| Interlocked graphene microarray<br>sensors         | 1.0 Pa-32 kPa  | 10.41 (<2.5 kPa)                    | 19                    | Our work  |

## Reference

48. C. Y. Hou, H. Z. Wang, Q. H. Zhang, Y. G. Li and M. F. Zhu, *Adv. Mater.*, 2014, **26**, 5018-5024.
49. Y. Si, S. Q. Wang, C. C. Yan, L. Yang, J. Y. Yu and B. Ding, *Adv. Mater.*, 2016, **28**, 9512-9518.
50. H. Tian, Y. Shu, X. F. Wang, M. A. Mohammad, Z. Bie, Q. Y. Xie, C. Li, W. T. Mi, Y. Yang and T. L. Ren, *Sci. Rep.*, 2015, **5**, 8603-8608.
51. S. Chun, Y. J. Kim, H. S. Oh, G. Bae and W. J. Park, *Nanoscale*, 2015, **7**, 11652-11659.

52. J. Lee, H. Kwon, J. Seo, S. Shin, J. H. Koo, C. Pang, S. Son, J. H. Kim, Y. H. Jang, D. E. Kim and T. Lee, *Adv. Mater.*, 2015, **27**, 2433-2439.
53. Y. Y. Qin, Q. Y. Peng, Y. J. Ding, Z. S. Lin, C. H. Wang, Y. Li, F. Xu, J. J. Li, Y. Yuan, X. D. He and Y. B. Li, *ACS nano*, 2015, **9**, 8933-8941.
54. Q. Shao, Z. Q. Niu, M. Hirtz, L. Jiang, Y. J. Liu, Z. H. Wang and X. D. Chen, *Small*, 2014, **10**, 1466-1472.
55. J. Kuang, Z. H. Dai, L. Q. Liu, Z. Yang, M. Jin and Z. Zhang, *Nanoscale*, 2015, **7**, 9252-9260.
